1  
2 **Interference of Neuronal TrkB Signaling by the Cannabis-Derived Flavonoids**  
3 **Cannflavins A and B**

4  
5 Jennifer Holborn<sup>1\*</sup>, Alicya Walczyk-Mooradally<sup>1\*</sup>, Colby Perrin<sup>1</sup>, Begüm Alural<sup>1</sup>, Cara  
6 Aitchinson<sup>1</sup>, Jibrán Y. Khokar<sup>2</sup>, Tariq A. Akhtar<sup>1</sup>, Jasmin Lalonde<sup>1</sup>

7  
<sup>1</sup> Department of Molecular and Cellular Biology, University of Guelph, 50 Stone Road E,  
Guelph, ON N1G 2W1, Canada.

<sup>2</sup> Department of Biomedical Science, University of Guelph, 50 Stone Road E, Guelph,  
ON N1G 2W1, Canada

\* J.H. and A.W.M. contributed equally to this report.

8 Correspondence to: **Jasmin Lalonde**  
9  
10 Email: [jlalon07@uoguelph.ca](mailto:jlalon07@uoguelph.ca)  
11 Phone: (519) 824-4120 x. 54706  
12 ORCID: 0000-0002-6797-1894  
13

14 Keywords: Cannflavins; Flavanoids; TrkB; BDNF; Arc

15 **ABSTRACT**

16 Cannflavins A and B are two flavonoids that accumulate in the *Cannabis sativa* plant. These  
17 specialized metabolites are uniquely prenylated and highly lipophilic, which, *a priori*, may permit  
18 their interaction with membrane-bound enzymes and receptors. Although previous studies found  
19 that cannflavins can produce anti-inflammatory responses by inhibiting the biosynthesis of pro-  
20 inflammatory mediators, the full extent of their cellular influence remains to be understood. Here,  
21 we studied these flavonoids in relation to the Tropomyosin receptor kinase B (TrkB), a receptor  
22 tyrosine kinase that is activated by the growth factor brain-derived neurotrophic factor (BDNF).  
23 Using mouse primary cortical neurons, we first collected evidence that cannflavins prevent the  
24 accumulation of Activity-regulated cytoskeleton-associated (Arc) protein upon TrkB stimulation  
25 by exogenous BDNF in these cells. Consistent with this effect, we also observed a reduced  
26 activation of TrkB and downstream signaling effectors that mediate *Arc* mRNA transcription when  
27 BDNF was co-applied with the cannflavins. Of note, we also performed a high-throughput screen  
28 that demonstrated a lack of agonist action of cannflavins towards 320 different G protein-coupled  
29 receptors, a result that specifically limit the possibility of a TrkB transinactivation scenario via G  
30 protein signaling to explain our results with dissociated neurons. Finally, we used Neuro2a cells  
31 overexpressing TrkB to show that cannflavins can block the growth of neurites and increased  
32 survival rate produced by the higher abundance of the receptor in this model. Taken together, our  
33 study offers a new path to understand the reported effects of cannflavins and other closely related  
34 compounds in different cellular contexts.

## 35 INTRODUCTION

36 Flavonoids are polyphenolic compounds found in various plant-derived foods and beverages.  
37 These phytochemicals represent a large family of molecules that can be classified into six main  
38 subclasses, based on their chemical structure: flavonols, flavanols (also known as flavan-3-ols or  
39 catechins), flavanones, flavones, anthocyanins, and isoflavones (Panche et al., 2016). Interestingly,  
40 evidence suggests that moderate habitual intake of flavonoids can lower the risk of cardiovascular  
41 disease, cancer, as well as all-cause mortality (Bondonno et al., 2019). Another purported benefit  
42 of these natural products is their positive influence on brain health and function, as several  
43 members of the flavonoid family have been found to promote neuroprotection, reduce  
44 neuroinflammation, and enhance cognition (Vauzour et al., 2008; Jaeger et al., 2018; Bakoyiannis  
45 et al., 2018). More precisely, flavonoids appear to modulate signaling pathways that are central to  
46 the control of neuronal survival and plasticity, such as the MAPK-CREB and PI3K-mTOR  
47 cascades (Vauzour et al., 2008; Jaeger et al., 2018). However, this particular line of inquiry has  
48 been little studied and therefore represents an opportunity to identify new bioactive compounds  
49 with therapeutic qualities among this family of phytochemicals.

50       Apart from the psychoactive molecule  $\Delta^9$ -tetrahydrocannabinol (THC) and other related  
51 cannabinoids with only mild or no psychotropic effect, like cannabidiol (CBD) and cannabigerol  
52 (CBG), the *Cannabis sativa* (*C. sativa*) plant also produces hundreds of specialized metabolites  
53 including at least twenty different flavonoid compounds (Flores-Sanchez et al., 2008). Among  
54 those, the flavones cannflavin A and cannflavin B (Figure 1A) are considered to accumulate  
55 uniquely in *C. sativa* cultivars. Seminal work by Barrett and colleagues performed more than 30  
56 years ago helped identify these two flavonoids and characterize them as inhibitors of prostaglandin  
57 E<sub>2</sub> production with the ability to produce anti-inflammatory effects that are approximately thirty

58 times more potent than acetylsalicylic acid, better known as aspirin (Barrett et al., 1985; 1986).  
59 However, a broader understanding of cannflavins' influence on cell biology in health and disease  
60 did not progress much since their initial description because of challenges associated with their  
61 extraction and the various political landscapes that limited their distribution. Nevertheless, some  
62 pre-clinical studies have provided intriguing new details about these molecules in recent years. For  
63 instance, the unnatural isomer of cannflavin B named FBL-03G (also known as caflanone) was  
64 found to increase apoptosis of pancreatic cancer cells *in vitro* while animal tests showed that the  
65 same small molecule could limit progression of metastatic pancreatic cancer (Moreau et al., 2019).  
66 Additionally, another study reported a possible neuroprotective effect of cannflavin A at  
67 concentrations lower than 10  $\mu$ M that was attributed to the ability of this molecule to reduce  
68 aggregation of  $\beta$  amyloid through direct docking in the hydrophobic groove of the protein (Eggers  
69 et al., 2019). While these different findings provide novel insights about the pharmacological  
70 potential of cannflavins, the full range of molecular changes induced by cannflavins in cells  
71 remains to be described. To address this gap in our understanding of cannflavin pharmacology, we  
72 therefore focused on identifying novel mechanisms of action of these two related cannabis-derived  
73 metabolites in neuronal cells.

74 Cannflavins A and B are prenylated and highly lipophilic small molecules (Barrett et al., 1985;  
75 Choi et al., 2004), a characteristic that allows them to easily accumulate into cells where they can  
76 then presumably interact with different membrane-bound enzymes and receptors. Previously, we  
77 published a chemogenomic analysis that aimed at identifying small molecule modulators of  
78 Activity-regulated cytoskeleton-associated protein (Arc), which is a key regulator of  
79 neuroplasticity and cognitive functions (Bramham et al., 2010; Korb et al., 2011; Kedrov et al.,  
80 2019). Our approach in that project exploited the ability of the growth factor brain-derived

81 neurotrophic factor (BDNF) to promote abundant *Arc* mRNA expression followed by nuclear  
82 accumulation of the protein product in mouse primary cortical neurons via activation of  
83 Tropomyosin receptor kinase B (TrkB) receptor (Lalonde et al., 2017). Here, we have adapted this  
84 assay to test the two cannflavins and found evidence of TrkB signaling interference by both  
85 molecules. These results then led us to complete a secondary high-throughput screen to test  
86 possible agonist activity of these flavonoids on G protein-coupled receptors (GPCRs), as well as  
87 other biochemical assays to confirm the influence of cannflavins and pinpoint their potential target  
88 engagement. These specific efforts suggest a model where cannflavins interfere with TrkB activity  
89 through direct inhibitory action on the receptor. Finally, image-based cellular test with  
90 immortalized Neuro2a cells ectopically expressing TrkB allowed us to demonstrate the capacity  
91 of cannflavins to block BDNF-induced neurite outgrowth. In summary, our study supports the  
92 classification of cannflavins as candidate inhibitors of TrkB receptor signaling in neuronal cells.

93

## 94 **METHODS**

### 95 *Cell culture and transfection*

96 Developing cerebral cortex from E16.5 CD-1 mouse embryos were dissected and then dissociated  
97 in trypsin solution for 15 min followed by three washes with phosphate-buffered saline (PBS).  
98 Trypsinized tissue was gently triturated to produce single cell suspension. Next, cells were seeded  
99 in poly-L-lysine/laminin coated 6-well plates at a density of  $1.5 \times 10^6$  per well and maintained in  
100 Neurobasal medium containing B27 supplement (2%, Invitrogen, Grand Island, NY), penicillin  
101 (50 U/ml, Invitrogen), streptomycin (50 µg/ml, Invitrogen) and glutamine (1 mM, Sigma). For  
102 experiments involving BDNF (PeproTech, Rocky Hill, NJ), the growth factor was added directly  
103 to the culture medium at a final concentration of 100 ng/ml for the indicated period of time.

104 Preparation of mouse primary cortical neuron cultures was approved by the University of Guelph  
105 Animal Care Committee and carried out according to institutional guidelines.

106 For neurite outgrowth assay, Neuro2a cells were cultured in DMEM [supplemented with 10%  
107 HyClone FetalClone II serum (Cytiva, Global Life Sciences Solutions, Marlborough, MA),  
108 penicillin (50 units/ml), and streptomycin (50 µg/ml)] and transfected overnight using  
109 Lipofectamine 2000 (Invitrogen) according to the manufacturer's protocol.

110

111 *Antibodies, plasmid, and pharmacological compounds*

112 The anti-Arc rabbit polyclonal affinity purified antibody (#156 003) was purchased from Synaptic  
113 Systems (Goettingen, Germany). The antibodies recognizing p42 Mapk (Erk2, sc-1647) was from  
114 Santa Cruz Biotechnology (Santa Cruz, CA). The antibodies recognizing phosphorylated  
115 TrkA<sup>Tyr490</sup>/TrkB<sup>Tyr516</sup> (#4619), phosphorylated p44/42 Mapk (Erk1/2<sup>Thr202/Tyr204</sup>, #4370), Akt  
116 (#4691), phosphorylated Akt<sup>Thr308</sup> (#2965), phosphorylated Akt<sup>Ser473</sup> (#4060), mTor (#2983),  
117 phosphorylated mTor<sup>Ser2448</sup> (#2971), and phosphorylated rpS6<sup>Ser240/244</sup> (#2215) were acquired from  
118 Cell Signaling Technology (Beverly, MA). The antibodies recognizing TrkB (MAB397) were  
119 acquired from R&D Systems (Minneapolis, MN). The antibodies recognizing β-actin (A1978) and  
120 M2 FLAG (F1804) antibodies were from Sigma-Aldrich (St-Louis, MO), while the Map2  
121 (AB5543) antibody was purchased from EMD Millipore Corps (Billerica, MA). Finally, cross-  
122 absorbed horseradish peroxidase-conjugated secondary antibodies were from Invitrogen.

123 The pCMV6-Ntrk2-Myc-DDK (FLAG) plasmid (MR226130) was purchased from OriGene  
124 Biotechnologies (Rockville, MD). ECGC, genistein, and daidzein were from Sigma-Aldrich.  
125 ANA-12 (Figure 1B) was from Tocris Bioscience (Bristol, UK) and U0126 was from Biosciences  
126 (Thermo Fisher).

127 The synthesis and purification of cannflavins A and B were produced using the method of Rea  
128 and colleagues (2019). Briefly, *Cannabis sativa* L. prenyltransferase 3 (CsPT3) was recombinantly  
129 expressed in *Saccharomyces cerevisiae* and the microsomal fraction containing CsPT3 was  
130 collected for *in vitro* enzyme assays. Assays containing 200  $\mu$ M chrysoeriol, 400  $\mu$ M GPP or  
131 DMAPP, 1 mg/mL of microsomal protein, and 10 mM MgCl<sub>2</sub> in 100 mM Tris-HCl buffer were  
132 conducted at 37°C for 120 min and terminated with the addition of 20% formic acid. Cannflavin  
133 products were extracted with three volumes of ethyl acetate, the organic layer was dried under N<sub>2</sub>  
134 gas and resuspended in methanol. The products were purified by HPLC on an Agilent 1260 Infinity  
135 system equipped with a Waters SPHERISORB 5  $\mu$ m ODS2 column, and eluted with a 20 min  
136 linear gradient from 45% to 95% methanol in water containing 0.1% formic acid. Product identities  
137 were confirmed via LC-MS according to published methods (Rea et al., 2019) (Supplementary  
138 Figure 1). Cannflavins produced *in vitro* were dried under nitrogen gas and resuspended in  
139 dimethyl sulfoxide (DMSO). The final products were confirmed via HPLC, as described above,  
140 and quantified by absorption at 340 nm relative to authentic standards.

141  
142 *Western blotting*  
143 For western blot analyses, cells were collected by scraping in ice-cold radioimmunoprecipitation  
144 assay (RIPA) buffer (50 mM tris-HCl [pH 8.0], 300 mM NaCl, 0.5% Igepal-630, 0.5%  
145 deoxycholic acid, 0.1% SDS, 1 mM EDTA) supplemented with a cocktail of protease inhibitors  
146 (Complete Protease Inhibitor without EDTA, Roche Applied Science, Indianapolis, IN) and  
147 phosphatase inhibitors (Phosphatase Inhibitor Cocktail 3, Sigma-Aldrich). One volume of 2 $\times$   
148 Laemmli buffer (100 mM tris-HCl [pH 6.8], 4% SDS, 0.15% bromophenol blue, 20% glycerol,  
149 200 mM  $\beta$ -mercaptoethanol) was added and the extracts were boiled for 5 min. Samples were

150 adjusted to an equal concentration after protein concentrations were determined using the BCA  
151 assay (Pierce, Thermo Fisher Scientific). Lysates were separated using SDS-PAGE  
152 (polyacrylamide gel electrophoresis) and transferred to a nitrocellulose membrane. After transfer,  
153 the membrane was blocked in TBST (tris-buffered saline and 0.1% Tween 20) supplemented with  
154 5% nonfat powdered milk and probed with the indicated primary antibody at 4°C overnight. After  
155 washing with TBST, the membrane was incubated with the appropriate secondary antibody and  
156 visualized using enhanced chemiluminescence (ECL) reagents according to the manufacturer's  
157 guidelines (Pierce, Thermo Fisher Scientific).

158 The following procedure was used to quantify western blot analyses. First, equal quantity of  
159 protein lysate as determined by the BCA assay was analyzed by SDS-PAGE for each biological  
160 replicate. Second, the exposure time of the film to the ECL chemiluminescence was the same for  
161 each biological replicate. Third, all the exposed films were scanned on a HP Laser Jet Pro M377dw  
162 scanner in grayscale at a resolution of 300 dpi. Fourth, the look-up table (LUT) of the scanned tiff  
163 images was inverted and the intensity of each band was individually estimated using the selection  
164 tool and the histogram function in Adobe Photoshop CC 2021 software. Finally, the intensity of  
165 each band was divided by the intensity of its respective loading control ( $\beta$ -actin) to provide the  
166 normalized value used for statistical analysis.

167

### 168 *Immunocytochemistry*

169 Indirect immunofluorescence detection of antigens was carried out using cortical neurons cultured  
170 on poly-L-lysine/laminin coated coverslips in 24-well plates at a density of  $0.1 \times 10^6$  per well.  
171 After experimental treatment, cells were washed twice with phosphate-buffered saline (PBS) and  
172 fixed for 30 min at room temperature with 4% paraformaldehyde in PBS. After fixation, cells were



173 washed twice with PBS, permeabilized with PBST (PBS and 0.25% Triton X-100) for 20 min,  
174 blocked in blocking solution (5% goat non-immune serum in PBS) for another 30 min, and finally  
175 incubated overnight at 4°C with the first primary antibody in blocking solution. The next day,  
176 coverslips were extensively washed with PBS and incubated for 2 hours at room temperature in  
177 the appropriate fluorophore-conjugated secondary antibody solution [Alexa Fluor 488-, Alexa  
178 Fluor 594, or Alexa Fluor 647-conjugated secondary antibody (Molecular Probes, Invitrogen) in  
179 blocking solution]. After washes with PBS, the coverslips were incubated again overnight in  
180 primary antibody solution for the second antigen, and the procedure for conjugation of the  
181 fluorophore-conjugated secondary antibody was repeated as above. Finally, cell nuclei were  
182 counterstained with 4',6-diamidino-2-phenylindole (DAPI), and coverslips were mounted on glass  
183 slides with ProLong Antifade reagent (Invitrogen).

184 Cells cultured on coverslips from three independent biological replicates were imaged with a  
185 Nikon Eclipse Ti2-E inverted microscope equipped with a motorized stage, image stitching  
186 capability, and a 60× objective (Nikon Instruments, Melville, NY). Image analysis was performed  
187 with ImageJ and NIS Elements and the following procedure was used to quantify nuclear Arc level  
188 in response to BDNF-TrkB signaling. First, original raw tiff files were opened and the nucleus of  
189 all neurons in the image was located based on Map2 immunostaining, then average pixel intensity  
190 corresponding to Arc immunofluorescence was measured for a 30-pixel spot positioned at the  
191 center of the nuclear compartment. Second, for each measure of Arc nuclear immunofluorescence  
192 pixel intensity, a measure of background pixel intensity from the same image channel was acquired  
193 and subsequently subtracted from the Arc nuclear immunofluorescence pixel intensity value.  
194 Finally, Arc immunofluorescence signal from untreated samples was used to establish an objective  
195 threshold (two standard deviations above the nuclear Arc immunofluorescence signal averaged

196 from a representative population of untreated neurons) which allowed for comparison of nuclear  
197 Arc expression between different experimental conditions.

198

199 *Real-time reverse transcriptase PCR*

200 After experimental treatment, total RNA was isolated from primary cortical neuron cultures using  
201 the TRIzol method (Invitrogen). The concentration of total RNA was measured using a NanoDrop  
202 ND-8000 spectrophotometer (Thermo Fisher Scientific) and first-strand complementary DNA  
203 (cDNA) was synthesized using the iScript cDNA Synthesis Kit (Bio-Rad, Hercules, CA). Real-  
204 time PCRs were performed using gene-specific primers and monitored by quantification of SYBR  
205 Green I fluorescence using a Bio-Rad CFX96 Real-Time Detection System. Expression was  
206 normalized against *Gapdh* expression. The relative quantification from three biological replicates  
207 was calculated using the comparative cycle threshold ( $\Delta\Delta C_T$ ) method.

208 Primers for real-time reverse transcription PCR experiments were: *Arc* primer pair one, 5'-  
209 TAGCCAGTGACAGGACCCAG-3' (forward) and 5'-CAGCTCAAGTCCTAGTTGGCAAA-3' (reverse);  
210 *Arc* primer pair two, 5'- CGCCAAACCCAATGTGATCCT-3' (forward) and 5'-  
211 TTGGACACTTCGGTCAACAGA-3' (reverse); *Gapdh*, 5'-ATGACCACAGTCCATGCCATC-3' (forward)  
212 and 5'-CCAGTGGATGCAGGGATGATGTTC-3' (reverse).

213

214 *PRESTO-Tango GPCR assay*

215 Parallel receptorome expression and screening via transcriptional output, with transcription  
216 activation following arresting translocation (PRESTO-Tango) was used to assess cannflavin A and  
217 cannflavin B potential to stimulate G protein-coupled receptors (GPCRs) according to published  
218 methods (Kroeze et al., 2015). Overall, 320 distinct nonolfactory human GPCRs were tested.

219

220 *Neurite outgrowth assessment*

221 Neuro2A cells transfected with a pCMV6-Ntrk2-Myc-DDK (FLAG) construct were selected with  
222 G-418 (Geneticin) to produce a stable cell line that constitutively expresses Myc-FLAG tagged-  
223 TrkB. For neurite outgrowth assessment, cells were seeded on 15 mm glass coverslips in 12-well  
224 plates at a density of  $2.0 \times 10^4$  per well and allowed to attach overnight. Next day, cells were treated  
225 with recombinant BDNF (1 nM) plus cannflavins (10  $\mu$ M), ANA-12 (10  $\mu$ M), or vehicle control  
226 (DMSO). Phase contrast digital images were collected with a Nikon Eclipse Ti2-E inverted  
227 microscope and a 20 $\times$  objective 24 hours after start of treatment (five fields per dish, three wells  
228 per condition). Image analysis was completed using ImageJ software using the following  
229 procedure. First, any cells with a fragmented nucleus were excluded from the analysis, therefore  
230 the total number of viable cells was counted per field. Second, for all identified viable cells the  
231 total number of neurites and number of cells with neurites longer than 2 cell bodies in diameter  
232 were counted per field.

233

234 *Statistics*

235 Unless mentioned otherwise, all results represent the mean  $\pm$ SEM from at least three independent  
236 experiments. ANOVA followed by Tukey's or Dunnett's post hoc test for multiple comparisons  
237 were performed where indicated.

238

239 **RESULTS**

240 *Impact of cannflavins on BDNF-induced Arc expression in mouse primary cortical neurons*

241 Previously, we completed a chemogenomic screen with primary mouse cortical neurons that  
242 identified a suite of compounds that acted as Arc expression modifiers (Lalonde et al., 2017). Part

243 of this group included five distinct flavonoids (Figure 1C)—namely (–)-epigallocatechin (ECGC),  
244 baicalin (BAI), 7,8-dihydroxyflavone (7,8-DHF), daidzein, and genistein—which were found to  
245 enhance nuclear Arc protein levels above the control measure when co-applied at a final  
246 concentration of 16.7  $\mu$ M with recombinant BDNF for 6 h. Searching for a possible explanation  
247 to this phenomenon, we were intrigued by several studies that had linked each of these five  
248 flavonoids to either enhancement of *BDNF* and/or *TrkB* mRNA expression, or to the potentiation  
249 of downstream TrkB-dependent signaling (Pan et al., 2012; Gundimeda et al., 2014; Ding et al.,  
250 2018; Lu et al., 2019). Based on these observations, we hypothesized that cannflavin A and  
251 cannflavin B could act in a similar fashion and promote Arc protein abundance when added to  
252 cultured mouse cortical neurons that were stimulated with exogenous BDNF. Unexpectedly,  
253 though, western blot analysis assessing BDNF-induced Arc expression in conjunction with  
254 cannflavins with concentrations of the flavonoids ranging between 1 to 20  $\mu$ M revealed an opposite  
255 effect. Specifically, we found that application of cannflavins to cell culture media prevented the  
256 normal increase in Arc protein by BDNF in a dose-dependent manner where 10-20  $\mu$ M of  
257 cannflavin A, and all tested concentrations (1-20  $\mu$ M) of cannflavin B, resulted in significantly  
258 less Arc protein abundance than seen in the BDNF-alone control measure (Figure 2A). To further  
259 support this result, we repeated the experiment using fluorescent immunocytochemistry and  
260 quantified nuclear Arc changes, as we had done previously in our chemogenomic screen (Lalonde  
261 et al., 2017). Of note, we also tested the flavonol ECGC, as well as the isoflavone daidzein and  
262 genistein, since those molecules were found to produce the opposite effect of increasing BDNF-  
263 induced nuclear Arc levels according to our previous screening results. As shown in Figure 2B  
264 and Supplementary Figure 2, cells that were co-treated with BDNF and 10  $\mu$ M daidzein or  
265 genistein presented a moderate increase in the percentage of nuclei with Arc expression above

266 threshold in comparison to the BDNF-alone control. Interestingly, though, the ECGC condition  
267 was similar on average to the BDNF-alone condition suggesting that the final concentration of this  
268 specific flavonoid must be greater than 10  $\mu$ M to have an impact of TrkB-induced nuclear Arc  
269 level. Most importantly, and consistent with our western blot analysis above, cultures treated with  
270 BDNF and 1-10  $\mu$ M cannflavins presented similar overall trends in the reduction of Arc-positive  
271 neuronal abundance in comparison to the unstimulated control (Figure 2C). Together, these results  
272 confirm the observed discrepancy between cannflavins and the other flavonoids found in our  
273 earlier screen, which focused on BDNF-induced Arc expression modifiers.

274 Next, to ascertain whether the cannflavins' influence on TrkB signaling and Arc protein levels  
275 was produced before or after gene transcription, we performed a quantitative polymerase chain  
276 reaction (qPCR) experiment using two pairs of primers targeting different regions of the *Arc*  
277 transcript. Here, comparison of *Arc* mRNA abundance between untreated, BDNF-alone control,  
278 and BDNF with cannflavin A (10  $\mu$ M) or cannflavin B (10  $\mu$ M) samples clearly indicated that  
279 cannflavins prevent induction of *Arc* mRNA expression (Figure 2D), therefore suggesting that the  
280 effect of these compounds must occur somewhere between the activation of TrkB receptors by  
281 BDNF and the activation of the transcriptional machinery involved in *Arc* expression.

282

### 283 *Evaluating agonist potential of cannflavins on Tango GPCR assay*

284 Considering the transactivation crosstalk between GPCRs and receptor tyrosine kinases, including  
285 TrkB (Rajagopal et al., 2004; 2006; El Zein et al., 2007), and recent evidence for GPCR  
286 modulation/self-association by flavonoids on the latter (Herrera-Hernández et al., 2017; Ortega et  
287 al., 2019), we speculated that one mechanism by which cannflavins could interfere on *Arc* mRNA  
288 expression in cortical neurons involves activation of a G protein signal that transinactivates the

289 function of molecular cascades downstream of TrkB receptors responsible for *Arc* expression. To  
290 explore this scenario, we tested the effect of cannflavins on the GPCRome, *en masse*, using the  
291 PRESTO-Tango assay—an unbiased high-throughput screening approach adapted to identify  
292 agonist activity of agents towards the large family of GPCRs (Kroeze et al, 2015). Interestingly,  
293 applying cannflavin A revealed no effect on any of the 320 different GPCRs tested while  
294 cannflavin B was found to produce only weak increase (4.4 fold-change) of GPR150 activity from  
295 baseline, a negligible effect in comparison to the positive control (51.3 fold-change, dopamine D<sub>2</sub>  
296 receptor stimulated by quinpirole) (Figure 3). Faced with these results, we then re-focused our  
297 attention on the possibility that cannflavins act more directly on the TrkB receptor and/or its  
298 downstream signaling components.

299

### 300 *Elucidating cannflavins effects on TrkB signaling*

301 BDNF binding to the extracellular domain of a TrkB receptor stimulates its dimerization and the  
302 phosphorylation of intracellular tyrosine residues which is followed by the recruitment of  
303 pleckstrin homology (PH) and SH2 domain containing proteins—such as FRS2, Shc, SH2B, and  
304 SH2B2—that regulate distinct concurrent signaling cascades (Qian et al., 1998; Meakin et al.,  
305 1999). To explore whether cannflavins interfere with the activation of TrkB receptors by BDNF  
306 in primary cortical neurons, we used a western blotting approach and probed lysates with a P-  
307 TrkA/B antibody. This approach revealed that, indeed, cannflavins can prevent BDNF from  
308 effectively stimulating its target receptor (Figure 4A). To further support this result, we tested the  
309 activation of signaling pathways that are likely regulated downstream of TrkB, including the Ras-  
310 Raf-MEK-Mapk and the PI3K/Akt/mTor cascades (Huang et al., 2003; Kowiański et al., 2018)  
311 (Figure 4B). Interestingly, our analyses revealed that both cannflavin A and cannflavin B sharply

312 reduced normal increase in P-Mapk, P-Akt, P-mTor, and P-rpS6 levels produced by BDNF (Figure  
313 4C). The fact that there were those changes in these three molecular pathways, which to a great  
314 extent occurs in parallel with limited cross-interaction (Kowiański et al., 2018), strongly suggest  
315 that cannflavins must act at an early stage in TrkB signal activation.

316

317 *Functional characterization TrkB inhibition by cannflavins on BDNF-dependent neurite*  
318 *outgrowth*

319 Our biochemical analyses with mouse primary cortical neurons suggest that cannflavins A and B  
320 have inhibitory activity towards TrkB receptors. In order to establish if this effect is sufficient to  
321 limit cellular processes under the control of BDNF signaling, we used neuroblastoma Neuro2a  
322 cells stably expressing Ntrk2 (TrkB)-Myc-FLAG to complete a neurite outgrowth experiment  
323 (Figure 5A). As shown in Figure 5B, Neuro2a cells have low TrkB expression with negligible  
324 phosphorylation of the receptor under basal conditions, while cells stably expressing the receptor  
325 display greater responsiveness to exogenous application of BDNF—which is clearly demonstrated  
326 by higher level of P-TrkB. Further, pre-application of cannflavins (20  $\mu$ M) with BDNF to the  
327 culture media for 6 h reduced BDNF-induced TrkB phosphorylation (Figure 5C). Interestingly, we  
328 did not observe a decrease in P-Mapk levels with treatment of ANA-12 or cannflavins as was  
329 observed in cortical neurons (Figure 4C), a distinction that we attribute to the fact that  
330 overexpression of TrkB in Neuro2A produced maximal phosphorylation of the p-42 subunit of  
331 Mapk and no change in signal when BDNF was added to the Neuro2a cells (Figure 5B). Most  
332 importantly, neurite assays completed with and without the application of ANA-12, cannflavin A,  
333 and cannflavin B revealed that all three compounds produced a significant decrease in the total  
334 number of neurites per field (Figure 5D and E) and number of cells with processes twice the length

335 of the cell (Figure 5F) when applied at a final concentration of 10  $\mu$ M to culture media. We also  
336 noticed a significant decrease in viable cells (Figure 5G) at this same concentration but only  
337 between the BDNF control condition and the BDNF plus ANA-12 or cannflavins. Of note, our  
338 measures of total number and length of neurites, as well as cell survival, for the ANA-12 and  
339 cannflavins conditions in this experiment were comparable to the baseline values were observed  
340 in wild-type Neuro2a cells not overexpressing TrkB (Supplementary Figure 3). Altogether, our  
341 results here strongly support that cannflavins act on TrkB receptors, preventing BDNF activation  
342 of downstream signaling of the receptor.

343

## 344 **DISCUSSION**

345 This study provides evidence for an inhibitory effect of cannflavins A and B, two flavonoids from  
346 *C. sativa*, on BDNF-induced Arc expression through disruption of TrkB receptor signaling. These  
347 results contrast our previous observations that various flavonoids exhibit a potentiating effect  
348 towards BDNF-induced Arc accumulation in mouse primary cortical neurons (Lalonde et al.,  
349 2017). Strikingly, the addition of cannflavin A or cannflavin B to the culture medium of mouse  
350 primary cortical neurons at a minimum concentration of 5  $\mu$ M consistently prevented the induction  
351 of Arc mRNA expression, suggesting that these molecules act between BDNF-activation of TrkB  
352 receptors and transcription of the Arc gene. Therefore, we subsequently investigated the impact of  
353 cannflavins on the downstream pathways of TrkB using biochemical analyses and uncovered a  
354 consistent decrease in the activation of the Ras-Raf-Mek-Mapk and the PI3K/Akt/mTor cascades.  
355 In connection with these results, we demonstrated that cannflavins inhibited BDNF-induced  
356 neurite outgrowth in neuroblastoma Neuro2a cells stably overexpressing TrkB. Taken together,  
357 our study provides a new path to better understand the effects that have been reported in recent



358 years about cannflavins and other closely related compounds against certain cancer cell types  
359 (Brunelli et al., 2009; Moreau et al., 2019).

360

361 *Structural determinants of cannflavins activity towards TrkB*

362 All flavonoids have a basic flavan nucleus with two aromatic rings (the A and the B rings)  
363 interconnected by a three-carbon-atom heterocyclic ring (the C ring), as illustrated in Figure 1C  
364 for the flavone 7,8-dihydroxyflavone (7,8-DHF, also known as tropoflavin). Interestingly, a  
365 previous study focusing on 7,8-DHF, which is a compound reported to mimic the physiological  
366 activity of BDNF and stimulate TrkB signaling *in vitro* and *in vivo* (Jang et al., 2010; Zeng et al.,  
367 2012), helps speculate about what precise structural feature might confers TrkB antagonistic  
368 activity to cannflavins. Specifically, previous comparison of different 7,8-DHF derivatives on  
369 TrkB phosphorylation and downstream Akt signaling revealed that the presence of a 3'-hydroxy  
370 group (or to a lesser extent a 2'-hydroxy group) on the B ring confers a TrkB stimulatory effect to  
371 a 7,8-DHF derivative compound whereas addition of a 4'-hydroxy group, as shown in Figure 6A  
372 with 7, 8, 4'-trihydroxyflavone and Figure 6B with 3, 5, 7, 8, 3, 4'-hexahydroxyflavone, inversely  
373 mediates inhibition of the receptor (Liu et al., 2010). Since cannflavins A and B are both  
374 hydroxylated at the 4' position on the B ring (Figure 1A), similar to compounds found by Liu and  
375 colleagues (2010) interfering with TrkB phosphorylation in rat primary cortical neurons (Figures  
376 6A and 6B), we thus suspect that this specific structural feature is key in mediating the TrkB  
377 antagonistic effect observed in our study. In this context, it will be revealing whether cannflavin  
378 derivatives with different patterns of hydroxylation on the B ring produce a different activity  
379 towards TrkB and downstream cellular effects.

380 In addition to 4' hydroxylation of the B ring, prenylation is another structural element that we  
381 must consider in relation to the difference we consistently observed between cannflavin A and  
382 cannflavin B towards TrkB. As seen in Figure 1A, cannflavin B has only one isoprene unit while  
383 cannflavin A has two, making the later an overall larger and more lipophilic molecule.  
384 Consequently, we speculate that the smaller size of cannflavin B may facilitate access and/or create  
385 a stronger binding affinity to TrkB in a cellular context, which could then explain why we have  
386 been measuring a more potent inhibitory response of the receptor phosphorylation and blunting of  
387 downstream signaling with this specific compound. Here, though, we also need to acknowledge  
388 the fact that our data do not demonstrate direct interaction of cannflavins A and B with TrkB at  
389 this point. Nevertheless, two specific results from our study support to a certain degree the idea  
390 that a direct functional interaction most likely occur between cannflavins and TrkB. First, our  
391 interrogation of the GPCRome using the PRESTO-Tango assay showed that cannflavins do not  
392 stimulate the activity of more than 300 GPCRs, which rules out the possibility that cannflavins are  
393 disrupting TrkB function through a GPCR transinactivation event in our cellular experiments  
394 (Rajagopal et al., 2004; 2006; El Zein et al., 2007). And second, our experiment with Neuro2a  
395 cells stably expressing TrkB reveals that cannflavins block the growth of neurites, as well as the  
396 observed cell survival stimulatory effect, produced by exogenous BDNF application in this model.  
397 Since these phenotypes are directly tied to the overexpression of TrkB, and that application of  
398 cannflavins consistently returns neurite and survival measures to those of wild-type Neuro2a cells  
399 (Supplementary Figure 3), we consider these results as evidence for a direct interaction between  
400 cannflavins and TrkB. To conclude on this point, whether the activity of receptor tyrosine kinases  
401 other than TrkB is interfered by cannflavins remains unknown and should be considered in future  
402 research.

403 *Therapeutic potential of cannflavins*

404 Although cannflavins are recognized to produce potent anti-inflammatory effects by inhibiting the  
405 biosynthesis of various pro-inflammatory mediators, including microsomal prostaglandin E<sub>2</sub>  
406 synthase-1 (mPGES-1) and 5-lipoxygenase (5-LO) (Barrett et al., 1985; 1986; Werz et al., 2014),  
407 our study cautions that these flavonoids may not be best to intervene against neuroinflammation  
408 or provide pro-cognitive effects because of their impact on TrkB signaling (Jaeger et al., 2018).  
409 That being said, cannflavin A and/or cannflavin B may prove to be helpful in other circumstances  
410 where TrkB signaling is instead found to be overactive or dysregulated. For instance, increased  
411 TrkB expression was detected in low-grade astrocytoma and glioblastoma (Wadhwa et al., 2003;  
412 Assimakopoulou et al., 2007), while BDNF-induced activation of TrkB has been found to increase  
413 the viability of brain-tumor stem cells isolated from glioblastoma (Lawn et al., 2015). Furthermore,  
414 a study uncovered a link between the ability of glioblastoma to make less invasive cancer cells  
415 around them more aggressive via the transfer of TrkB-containing exosomes, revealing this way a  
416 mechanism by which these tumours can influence their environment to promote disease  
417 progression and aggressiveness (Pinet et al., 2016), while other reports have shown that inhibition  
418 of TrkB-associated signaling may be an effective strategy to limit the formation of astrocytomas  
419 (Ni et al., 2017) as well as the survival of glioblastoma cancer cells (Pinheiro et al., 2017). Finally,  
420 emerging evidence suggest that TrkB signaling could also be a therapeutic target for other cancer  
421 types, including lung (Sinkevicius et al., 2014; Chen et al., 2016), breast (Choy et al., 2017;  
422 Contreras-Zárate et al., 2019), and pancreatic cancer (Oyama et al., 2021). Taken together, these  
423 studies suggest that targeting TrkB signaling with cannflavins may provide therapeutic benefits  
424 against these cancer types. In conclusion, our study expands the range of cellular effect for

- 425 cannflavins beyond inflammation and supports the examination in more detail of these compounds
- 426 as possible anti-cancer agents.

427 **DATA AVAILABILITY STATEMENT**

428 The raw data supporting the conclusions of this article will be made available by the authors,  
429 without undue reservation.

430

431 **ETHICS STATEMENT**

432 The use of mice for primary neuron cultures was reviewed and approved by the University of  
433 Guelph Animal Care Committee.

434

435 **CONFLICT OF INTEREST**

436 TAA received sponsored research funding from Atlas 365 that was used for the preparation of  
437 cannflavins used in this research. The other authors declare no conflict of interest.

438

439 **AUTHOR CONTRIBUTIONS**

440 JH, AWM, BA, JYK, and JL planned and designed the experiments. CP, JYK, and TAA provided  
441 key resources, and JH, AWM, BA, and CA performed the research. JH, AWM, BA, CP, CA, and  
442 JL analyzed the data and prepared figures. JH, AWM, and JL wrote the manuscript with revisions  
443 from all other authors.

444

445 **FUNDING**

446 This work was supported by a Natural Sciences and Engineering Research Council of Canada  
447 (NSERC) Discovery Grant (401389), the Canadian Foundation for Innovation (CFI, 037755), and  
448 generous start-up funding from the University of Guelph (all to JL). A.W.M was supported by the  
449 University of Guelph (Graduate Tuition Scholarship).

450 **ACKNOWLEDGMENTS**

451 We wish to thank Drs. Dyanne Brewer and Armen Charchoglyan for their assistance with mass  
452 spectrometry analysis of cannflavins, as well as the NIMH Psychoactive Drug  
453 Screening Program (NIMH-PDSP) for help collecting the Tango GPCR assay results presented in  
454 this study.

455 **REFERENCES**

- 456 Assimakopoulou, M., Kondyli, M., Gatzounis, G., Maraziotis, T., Varakis, J. (2007) Neurotrophin  
457 receptors expression and JNK pathway activation in human astrocytomas. *BMC Cancer* 7,202.
- 458 Bakoyiannis, I., Daskalopoulou, A., Pergialiotis, V., Perrea, D. (2018) Phytochemicals and  
459 cognitive health: Are flavonoids doing the trick? *Biomed. Pharmacother.* 190, 1488-1497.
- 460 Barrett, M.L., Gordon, D., Evans, F.J. (1985) Isolation from *Cannabis sativa* L. of cannflavin—a  
461 novel inhibitor of prostaglandin production. *Biochem. Pharmacol.* 34, 2019-2024.
- 462 Barrett, M.L., Scutt, A.M., Evans, F.J. (1986) Cannflavin A and B, prenylated flavones from  
463 *Cannabis sativa* L. *Experientia* 42, 452-453.
- 464 Bondonno, N.P., Dalgaard, F., Kyrø, C., Murray, K., Bondonno, C.P., Lewis, J.R., Croft, K.D.,  
465 Gislason, G., Scalbert, A., Cassidy, A., Tjønneland, A., Overvad, K., Hodgson, J.M. (2019)  
466 Flavonoid intake is associated with lower mortality in the Danish Diet Cancer and Health  
467 Cohort. *Nat. Commun.* 10, 3651.
- 468 Bramham, C.R., Alme, M.N., Bittins, M., Kuipers, S.D., Nair, R.R., Pai, B., Panja, D., Schubert,  
469 M., Soule, J., Tiron, A., Wibrand, K. (2010) The Arc of synaptic memory. *Exp. Brain Res.*  
470 200, 125-140.
- 471 Brunelli, E., Pinton, G., Bellini, P., Minassi, A., Appendino, G., Moro, L. (2009) Flavonoid-  
472 induced autophagy in hormone sensitive breast cancer cells. *Fitoterapia* 80, 327-332.
- 473 Cazorla, M., Prémont, J., Mann, A., Girard, N., Kellendonk, C., Rognan, D. (2011) Identification  
474 of a low-molecular weight TrkB antagonist with anxiolytic and antidepressant activity in  
475 mice. *J Clin Invest.* 121, 1846-1857.

- 476 Chen, B., Liang, Y., He, Z., An, Y., Zhao, W., Wu, J. (2016) Autocrine activity of BDNF induced  
477 by the STAT3 signaling pathway causes prolonged TrkB activation and promotes human non-  
478 small-cell lung cancer proliferation. *Sci. Rep.* 6, 30404.
- 479 Choi, Y.H., Hazekamp, A., Peltenburg-Looman, A.M., Frédérick, M., Erkelens, C., Lefeber, A.W.,  
480 Verpoorte, R. (2004) NMR assignment of the major cannabinoids and cannabiflavonoids  
481 isolated from flowers of *Cannabis sativa*. *Phytochem. Anal.* 15, 345-354.
- 482 Choy, C., Ansari, K.I., Neman, J., Hsu, S., Duenas, M.J., Li, H., Vaidehi, N., Jandial, R. (2017)  
483 Cooperation of neurotrophin receptor TrkB and Her2 in breast cancer cells facilitates brain  
484 metastases. *Breast Cancer Res.* 19, 51.
- 485 Contreras-Zárate, M.J., Day, N.L., Ormond, D.R., Borges, V.F., Tobet, S., Gril, B., Steeg, P.S.,  
486 Cittelly, D.M. (2019) Estradiol induces BDNF/TrkB signaling in triple-negative breast cancer  
487 to promote brain metastases. *Oncogene* 38, 4685-4699.
- 488 Ding, S., Zhuge, W., Hu, J., Yang, J., Wang, X., Wen, F., Wang, C., Zhuge, Q. (2018) Baicalin  
489 reverses the impairment of synaptogenesis induced by dopamine burden via the stimulation  
490 of GABA<sub>A</sub>R-TrkB interaction in minimal hepatic encephalopathy. *Psychopharmacology* 235,  
491 1163-1178.
- 492 Eggers, C., Fujitani, M., Kato, R., Smid, S. (2019) Novel cannabis flavonoid, cannflavin A  
493 displays both a hormetic and neuroprotective profile against amyloid  $\beta$ -mediated  
494 neurotoxicity in PC12 cells: Comparison with geranylated flavonoids, mimulone and  
495 diplacone. *Biochem. Pharmacol.* 169, 113609.
- 496 El Zein N., Badran, B.M., Sariban, E. (2007) The neuropeptide pituitary adenylate cyclase  
497 activating protein stimulates human monocytes by transactivation of the Trk/NGF pathway.  
498 (2007) *Cell. Signal.* 19, 152-162.



- 499 Flores-Sanchez, I.J., Verpoorte, R. (2008) Secondary metabolism in *Cannabis*. *Phytochem. Rev.*  
500 7, 615-639.
- 501 Gundimeda, U., McNeill, T.H., Fan, T.K., Deng, R., Rayudu, D., Chen, Z., Cadenas, E.,  
502 Gopalakrishna, R. (2014) Green tea catechins potentiate the neuritogenic action of brain-  
503 derived neurotrophic factor: role of 67-kDa laminin receptor and hydrogen peroxide.  
504 *Biochem. Biophys. Res. Commun.* 445, 218-224.
- 505 Gupta, V.K., You, Y., Gupta, V.B., Klistorner, A., Graham, S.L. (2013) TrkB receptor signalling:  
506 implications in neurodegenerative, psychiatric and proliferative disorders. *Int J Mol Sci.* 14,  
507 10122-10142.
- 508 Herrera-Hernández, M.G., Ramon, E., Lupala, C.S., Tena-Campos, M., Pérez, J.J., Garriga, P.  
509 (2017) Flavonoid allosteric modulation of mutated visual rhodopsin associated with retinitis  
510 pigmentosa. *Sci. Rep.* 7, 11167.
- 511 Huang, E.J., Reichardt, L.F. (2003) Trk receptors: Roles in neuronal signal transduction. *Annu.*  
512 *Rev. Biochem.* 72, 609-642.
- 513 Jaeger, B.N., Parylak, S.L., Gage, F.H. (2018) Mechanisms of dietary flavonoid action in neuronal  
514 function and neuroinflammation. *Mol. Aspects Med.* 61, 50-62.
- 515 Kedrov, A.V., Durymanov, M., Anokhin, K.V. (2019) The Arc gene: Retroviral heritage in  
516 cognitive functions. *Neurosci. Biobehav. Rev.* 99, 275-281.
- 517 Korb, E., Finkbeiner, S. (2011) Arc in synaptic plasticity: from gene to behavior. *Trends Neurosci.*  
518 34, 591-598.
- 519 Kowiański, P., Lietzau, G., Czuba, E., Waśkow, M., Steliga, A., Moryś, J. (2018) BDNF: A key  
520 factor with multipotent impact on brain signaling and synaptic plasticity. *Cell. Mol. Neurobiol.*  
521 38, 579-593.

- 522 Kroeze, W.K., Sassano, M.F., Huang, X.P., Lansu, K., McCorvy, J.D., Giguère, P.M., Sciaky, N.,  
523 Roth, B.L. (2015) PRESTO-Tango as an open-source resource for interrogation of the  
524 druggable human GPCRome. *Nat. Struct. Mol. Biol.* 22, 362-369.
- 525 Lalonde, J., Reis, S.A., Sivakumaran, S., Holland, C.S., Wesseling, H., Sauld, J.F., Alural, B.,  
526 Zhao, W.N., Steen, J.A., Haggarty, S.J. (2017) Chemogenomic analysis reveals key role for  
527 lysine acetylation in regulating Arc stability. *Nat. Commun.* 8, 1659.
- 528 Lawn, S., Krishna, N., Pisklakova, A., Qu, X., Fenstermacher, D.A., Fournier, M., Vrionis, F.D.,  
529 Tran, N., Chan, J.A., Kenchappa, R.S., Forsyth, P.A. (2015) Neurotrophin signaling via TrkB  
530 and TrkC receptors promotes the growth of brain tumor-initiating cells. *J. Biol. Chem.*  
531 290,3814-3824.
- 532 Lu, Y., Sun, G., Yang, F., Guan, Z., Zhang, Z., Zhao, J., Liu, Y., Chu, L., Pei, L. (2019) Baicalin  
533 regulates depression behavior in mice exposed to chronic mild stress via the Rac/LIMK/cofilin  
534 pathway. *Biomed. Pharmacother.* 116, 109054.
- 535 Meakin, S.O., MacDonald, J.I.S., Gryz, E.A., Kubum C.J., Verdim J.M. (1999) The signaling  
536 adapter FRS-2 competes with Shc for binding to the nerve growth factor receptor TrkA. *J Biol*  
537 *Chem.* 274, 9861-9870.
- 538 Moreau, M., Ibeh, U., Decosmo, K., Bih, N., Yasmin-Karim, S., Toyang, N., Lowe, H., Ngwa, W.  
539 (2019) Flavonoid derivative of *Cannabis* demonstrates therapeutic potential in preclinical  
540 models of metastatic pancreatic cancer. *Front. Oncol.* 9, 660.
- 541 Ni, J., Xie, S., Ramkissoon, S.H., Luu, V., Sun, Y., Bandopadhyay, P., Beroukhim, R., Robers,  
542 T.M. Stiles, C.D., Segal, R.A., Ligon, K.L., Hahn, W.C., Zhao, J.J. (2017) Tyrosine receptor  
543 kinase B is a drug target in astrocytomas. *Neuro Oncol.* 19, 22-30.
- 544

- 545 Oyama, Y., Nagao, S., Na, L., Yanai, K., Umebayashi, M., Nakamura, K., Nagai, S., Fujimura,  
546 A., Yamasaki, A., Nakayama, K., Morisaki, T., Onishi, H. (2021) TrkB/BDNF signaling could  
547 be a new therapeutic target for pancreatic cancer. *Anticancer Res.* 41, 4047-4052.
- 548 Ortega, J.T., Parmar, T., Jastrzebska, B. (2019) Flavonoids enhance rod opsin stability, folding,  
549 and self-association by directly binding to ligand-free opsin and modulating its conformation.  
550 *J. Biol. Chem.* 294, 8101-8122.
- 551 Pan, M., Han, H., Zhong, C., Geng, Q. (2012) Effects of genistein and daidzein on hippocampus  
552 neuronal cell proliferation and BDNF expression in H19-7 neural cell line. *J. Nutr. Health*  
553 *Aging* 16, 389-394.
- 554 Panche, A.N., Diwan, A.D., Chandra, S.R. (2016) Flavonoids: an overview. *J. Nutr. Sci.* 5, e47.
- 555 Pinet, S., Bessette, B., Vedrenne, N., Lacroix, A., Richard, L., Jauberteau, M.O., Battu, S., Lalloué,  
556 F. (2016) TrkB-containing exosomes promote the transfer of glioblastoma aggressiveness to  
557 YKL-40-inactivated glioblastoma cells. *Oncotarget* 7,50349-50364
- 558 Pinheiro, K.V., Alves, C., Buendia, M., Gil, M.S., Thomaz, A., Schwartzmann, G., de Farias, C.B.,  
559 Roesler, R., Bowman, R.L., Wang, Q., Carro, A., Verhaak, R.G., Squatrito, M. (2017)  
560 Targeting tyrosine receptor kinase B in gliomas. *Neuro Oncol.* 19,138-139.
- 561 Qian, X., Riccio, A., Zhang, Y., Ginty, D.D. (1998) Identification and characterization of novel  
562 substrates of Trk receptors in developing neurons. *Neuron.* 21, 1017–1029.
- 563 Rajagopal, R., Chao, M.V. (2006) A role for Fyn in Trk receptor transactivation by G-protein-  
564 coupled receptor signaling. *Mol. Cell Neurosci.* 33, 36-46.
- 565 Rajagopal, R., Chen, Z.Y., Lee, F.S., Chao, M.V. (2004) Transactivation of Trk neurotrophin  
566 receptors by G-protein-coupled receptor ligands occurs on intracellular membranes. *J.*  
567 *Neurosci.* 24, 6650-6658.

- 568 Rea, K.A., Cararetto, J.A., Al-Abdul-Wahid, M.S., Sukumaran A., Geddes-McAlister J., Rothstein  
569 S.J., Akhtar T.A. (2019) Biosynthesis of cannflavins A and B from *Cannabis sativa* L.  
570 *Phytochemistry*, 164, 162-171.
- 571 Sinkevicius, K.W., Kriegel, C., Bellaria, K.J., Lee, J., Lau, A.N., Leeman, K.T., Zhou, P., Beede,  
572 A.M., Fillmore, C.M., Caswell, D., Barrios, J., Wong, K.K., Sholl, L.M., Schlaeger, T.M.,  
573 Bronson, R.T., Chirieac, L.R., Winslow, M.M.m Gaihis, M.C., Kim, C.F. (2014)  
574 Neurotrophin receptor TrkB promotes lung adenocarcinoma metastasis. *Proc. Natl. Acad. Sci.*  
575 *U.S.A.* 111, 10299-10304.
- 576 Vauzour, D., Vafeiadou, K., Rodriguez-Mateos, A., Rendeiro, C., Spencer, J.P. (2008) The  
577 neuroprotective potential of flavonoids: a multiplicity of effects. *Genes Nutri.* 3, 115-226.
- 578 Wadhwa, S., Nag. T.C., Jindal, A., Kushwaha, R., Mahapatra, A.K., Sarkar, C. (2003) Expression  
579 of the neurotrophin receptors Trk A and Trk B in adult human astrocytoma and glioblastoma.  
580 *J. Biosci.* 28, 181-188.
- 581 Werz, O., Seegers, J., Schaible, A. M., Weinigel, C., Barz, D., Koeberle, A., Allegrone, G.,  
582 Pollastro, F., Zampieri, L., Grassi, G., Appendino, G. (2014). Cannflavins from hemp sprouts,  
583 a novel cannabinoid-free hemp food product, target microsomal prostaglandin E<sub>2</sub> synthase-1  
584 and 5-lipoxygenase. *Pharmanutr.* 2, 53-60.

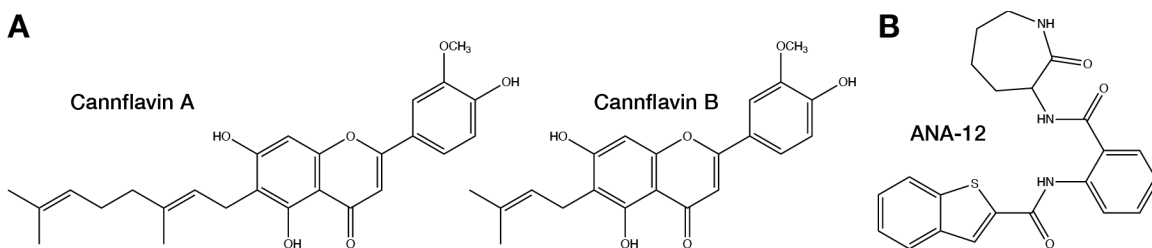

**C**

| Name                                | Flavonoid class | Structure | Reported impact on BDNF-induced Arc expression in mouse primary cortical neurons at a concentration of 16.7 $\mu$ M (Lalonde et al., 2017) |
|-------------------------------------|-----------------|-----------|--------------------------------------------------------------------------------------------------------------------------------------------|
| (-)-Epigallocatechin gallate (EGCG) | Flavanol        |           | 1.9 fold-change<br>(normalized value to BDNF baseline + vehicle treated cells)                                                             |
| Baicalin                            | Flavone         |           | 1.8 fold-change                                                                                                                            |
| Daidzein                            | Isoflavone      |           | 2.1 fold-change                                                                                                                            |
| Genistein                           | Isoflavone      |           | 1.6 fold-change                                                                                                                            |
| 7,8-Dihydroxyflavone (7,8-DHF)      | Flavone         |           | 1.7 fold-change                                                                                                                            |

586 **Figure 1. Chemical structures of key compounds. A)** Chemical structure for cannflavin A and  
587 cannflavin B. **B)** Structure for the small molecule TrkB inhibitor ANA-12. **C)** Table presenting  
588 flavonoids organized by name, flavonoid class, chemical structure, and impact of BDNF-induced  
589 Arc expression in mouse primary cortical neurons as reported in Lalonde et al. (2017). Position of  
590 each ring is labeled for 7,8-dihydroxyflavone.

591

592

FIGURE 2

HOLBORN, WALCZYK-MOORADALLY ET AL.

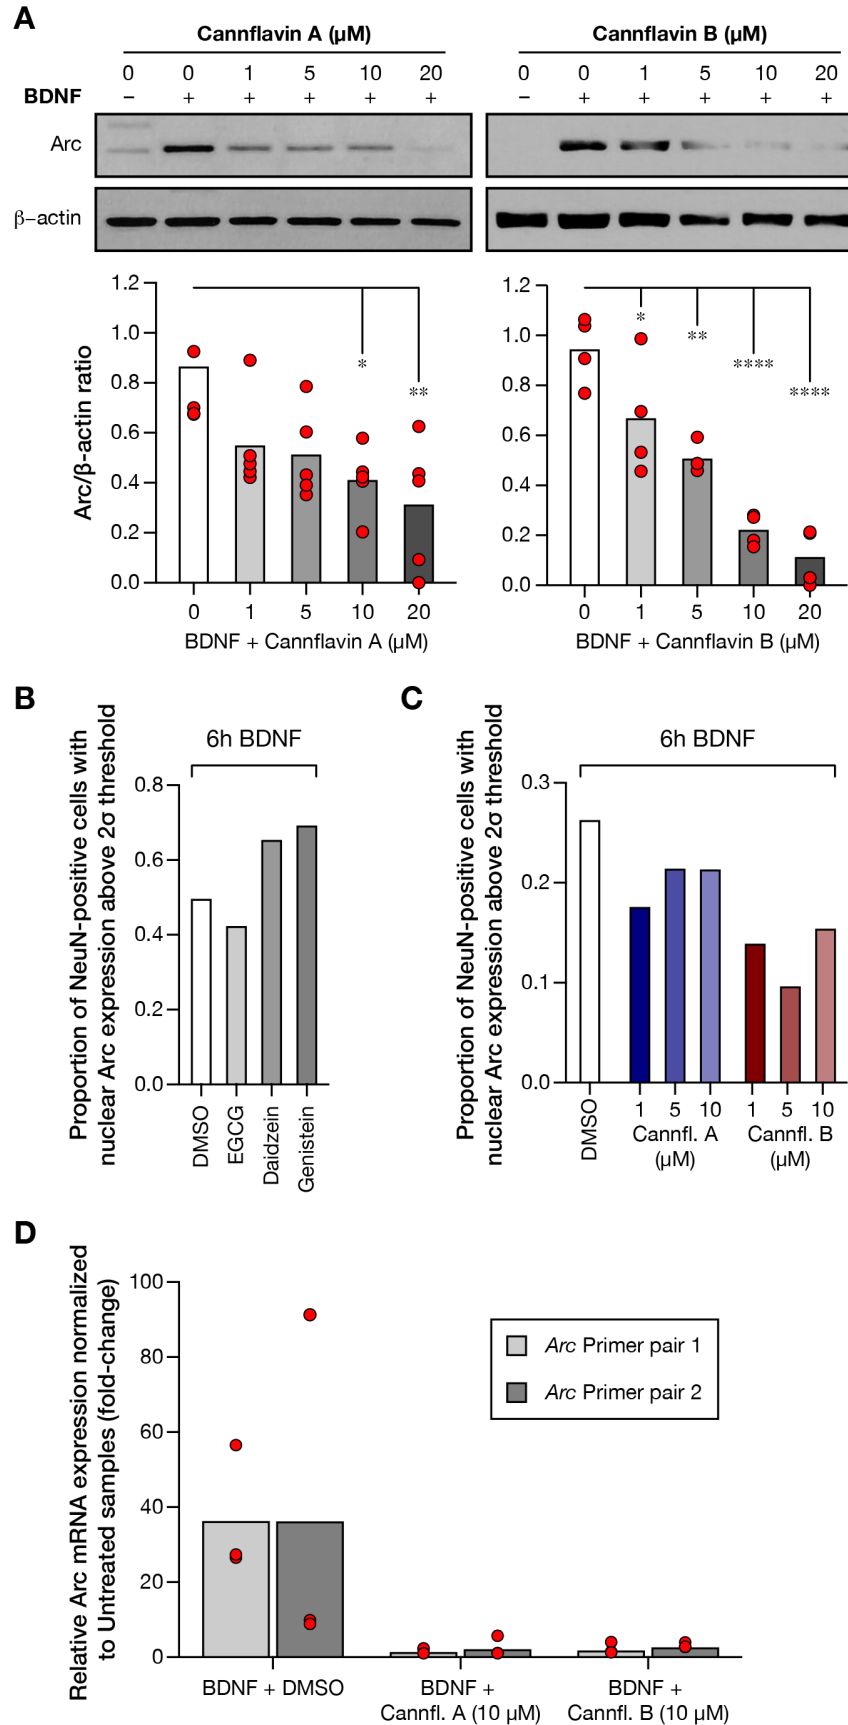

594 **Figure 2. Cannflavin A and cannflavin B decrease BDNF-induced Arc protein and mRNA**  
595 **levels in mouse primary cortical neurons. A)** Western blot and corresponding densitometry  
596 analysis showing Arc protein abundance in mouse primary cortical cultures when treated with  
597 BDNF and various concentrations (0, 1, 5, 10, 20  $\mu$ M) of cannflavin A (left) or cannflavin B  
598 (right).  $\beta$ -actin was used a loading control and graphs show mean of Arc/ $\beta$ -actin ratio for each  
599 condition. Biological replicates:  $n = 5$  (cannflavin A),  $n = 4$  (cannflavin B). One way ANOVA  
600 revealed a significant decrease in the abundance of Arc with increasing cannflavin concentrations.  
601 Cannflavin A ( $F_{4,20} = 4.568, p = 0.0088$ ), Tukeys post-hoc test, \*  $p < 0.05$ , \*\*  $p < 0.001$ . Cannflavin  
602 B ( $F_{4,15} = 24.07, p < 0.0001$ ), Tukeys post-hoc test, \*  $p < 0.05$ , \*\*  $p < 0.001$ , \*\*\*\*  $p < 0.0001$ . **B)**  
603 Quantification of immunocytochemistry coverslips treated with various flavonoids (EGCG,  
604 daidzein, and genistein; all 10  $\mu$ M final concentration). Quantification was completed by using a  
605 ratio of MAP2-positive cells with nuclear Arc above the  $2\sigma$  nuclear Arc pixel intensity in the  
606 control condition (BDNF treatment alone). **C)** Quantification of immunocytochemistry coverslips  
607 treated with various concentrations (0, 1, 5, 10  $\mu$ M) of cannflavin A (blue bars) or cannflavin B  
608 (red bars). Quantification was completed similar to B. **D)** Quantitative real-time PCR *Arc* mRNA  
609 analysis using two *Arc* primer pairs shows a decrease in *Arc* transcripts when treated with 10  $\mu$ M  
610 of cannflavin A or cannflavin B, relative to cells treated with BDNF alone.



FIGURE 2

HOLBORN, WALCZYK-MOORADALLY ET AL.

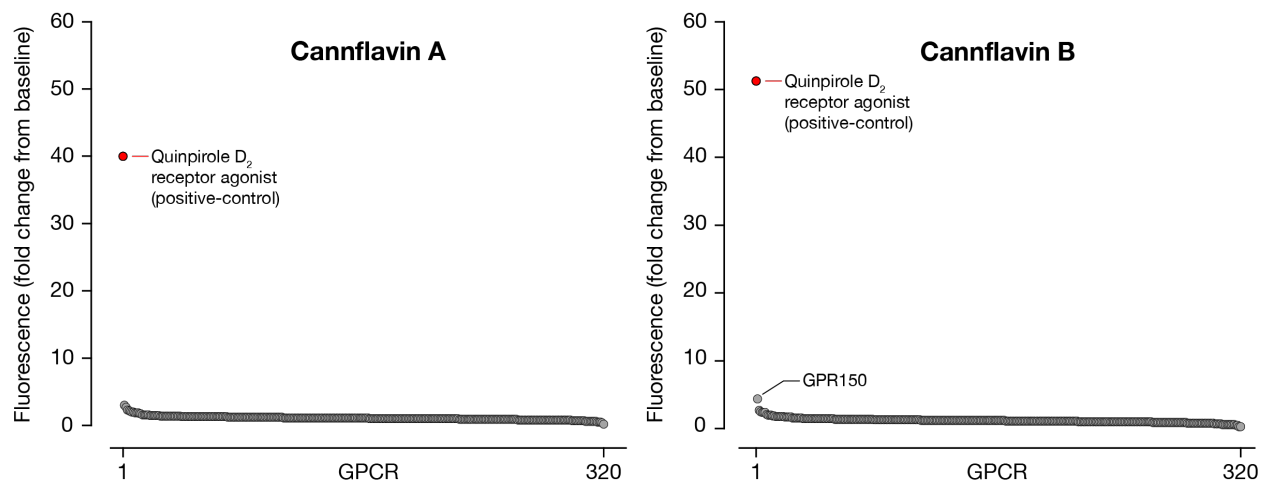

611  
612  
613 **Figure 3. Cannflavins do not stimulate G protein-coupled receptors signaling.** Data for 320  
614 GPCRs are presented as an average fold change from baseline upon compound addition.  
615 Application of quinpirole to D<sub>2</sub> receptor is used as positive control in each plate. Compounds were  
616 used at 10  $\mu$ M and all tests run in quadruplicate.

FIGURE 4

HOLBORN, WALCZYK-MOORADALLY ET AL.

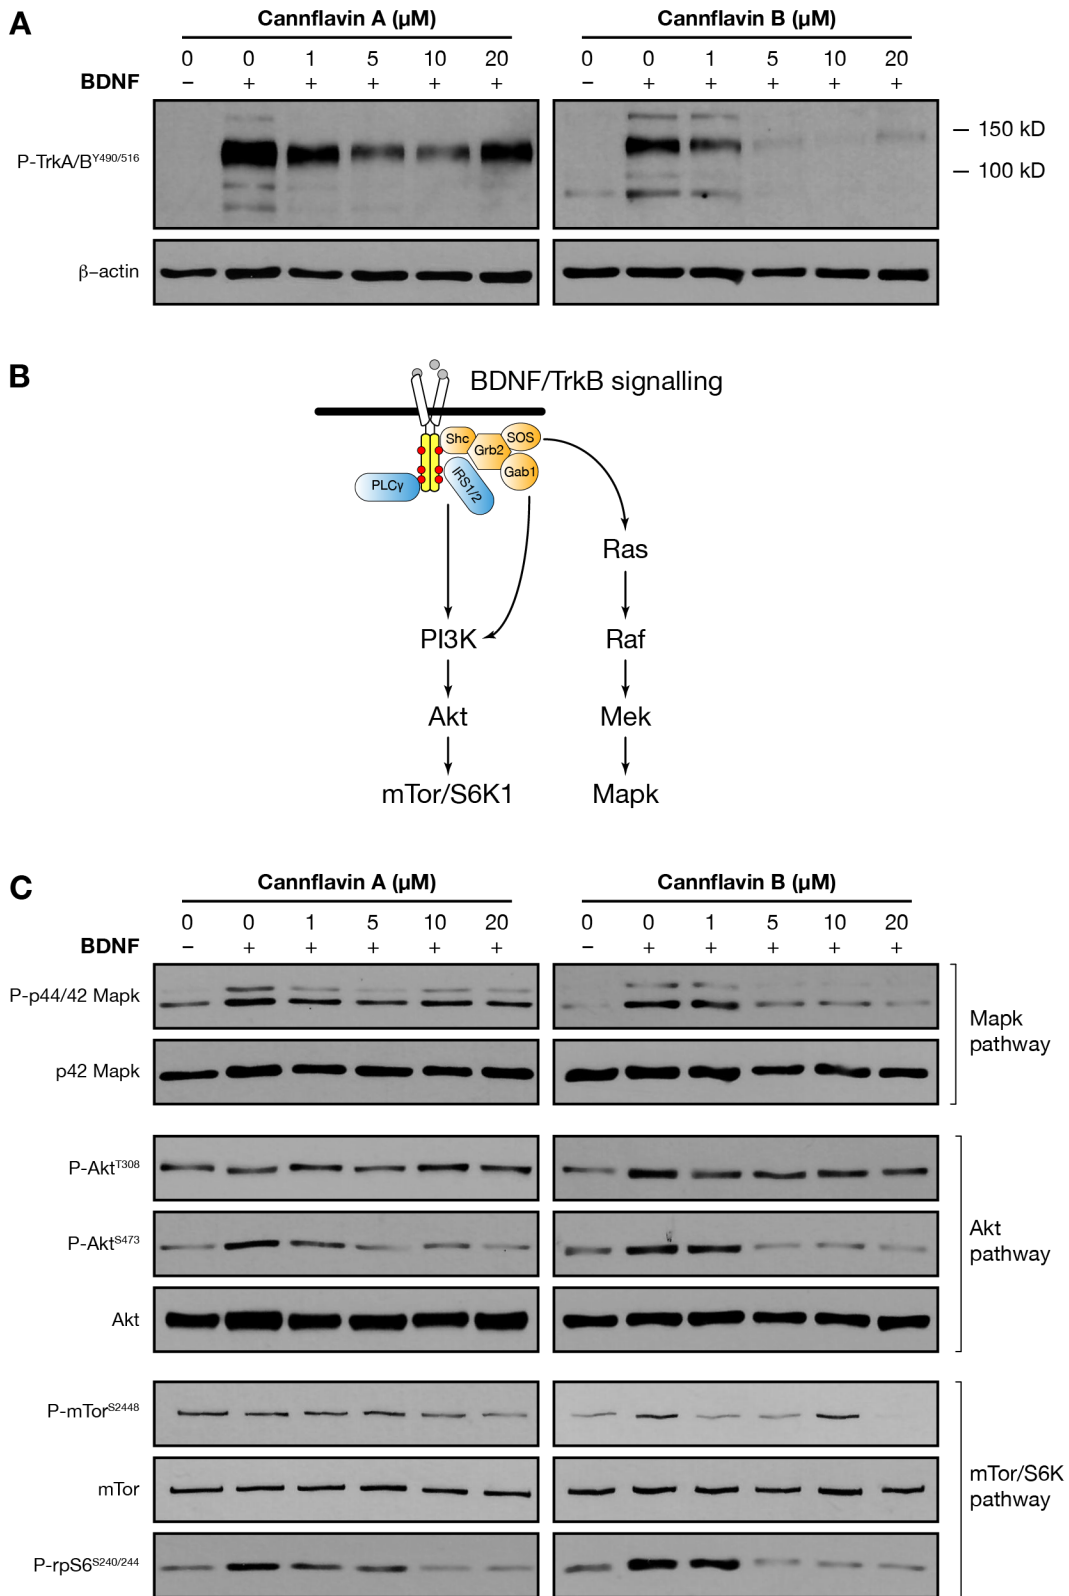

617  
618  
619

620 **Figure 4. Cannflavin A and cannflavin B decrease activation of downstream pathways of**  
621 **TrkB. A)** Western blot analysis showing phosphorylation of TrkB when treated with BDNF and  
622 various concentrations (0, 1, 5, 10, 20  $\mu$ M) of cannflavin A (left) or cannflavin B (right).  $\beta$ -actin  
623 was used a loading control. **B)** Simplified schematic of BDNF activation of TrkB receptors and  
624 downstream signaling pathways. **C)** Western blot analysis showing phosphorylation of Mapk, Akt,  
625 and mTor proteins when treated with various concentrations (0, 1, 5, 10, 20  $\mu$ M) of cannflavin A  
626 (left) or cannflavin B (right).

FIGURE 5

HOLBORN, WALCZYK-MOORADALLY ET AL.

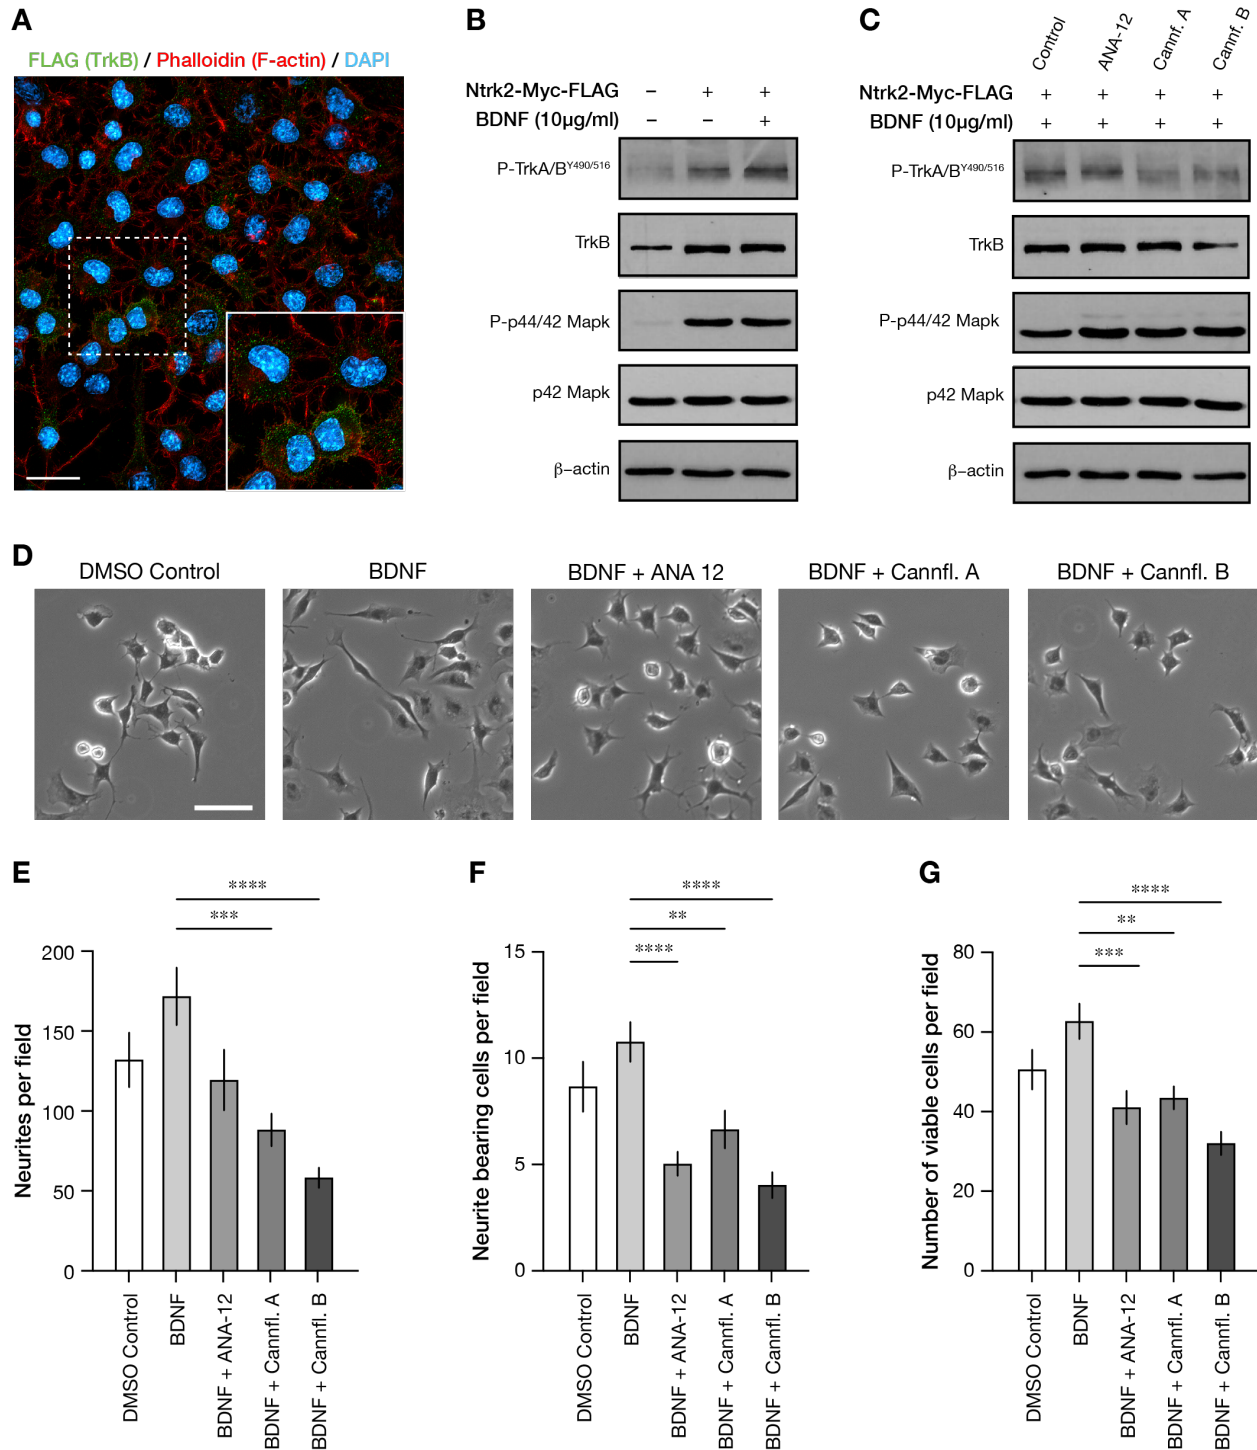

627  
628  
629

**Figure 5. Cannflavin A and cannflavins B reduces BDNF-induced neurite outgrowths in**

630 **neuroblastoma cells.** A) Neuro2a cells were transfected to stably express Ntrk2-Myc-FLAG.

631 Immunocytochemistry was completed to validate that the cells were successfully transfected. Scale

632 bar = 20  $\mu$ M. **B)** Western blot analysis showing phosphorylation of TrkB and Mapk in regular  
633 Neuro2a cells compared to those stably expressing Ntrk2-Myc-FLAG.  $\beta$ -actin was used a loading  
634 control. **C)** Western blot analysis showing phosphorylation of TrkB and Mapk when treated with  
635 10  $\mu$ M of ANA-12, cannflavin A, or cannflavin B with the addition of BDNF (10  $\mu$ g/mL). The  
636 small-molecule non-competitive TrkB antagonist ANA-12 was used as a positive control (Cazorla  
637 et al., 2011) and  $\beta$ -actin was used as a loading control. **D)** Phase contrast images of Ntrk2-Myc-  
638 FLAG Neuro2as treated with or without BDNF (10  $\mu$ g/mL) and 10  $\mu$ M of ANA-12, cannflavin A,  
639 or cannflavin B. Scale bar = 50  $\mu$ m. Images were quantified by counting **E)** total number of  
640 neurites, and **F)** total number of cells bearing neurites twice the length of cell body, and **G)** number  
641 of viable cells per imaged area. One-way ANOVA was used to analyze data. Total number of  
642 neurites ( $F_{4,150} = 8.264, p < 0.001$ ); total number of cells bearing neurites ( $F_{4,150} = 9.433, p < 0.001$ );  
643 number of viable cells ( $F_{4,150} = 8.071, p < 0.001$ ). Dunnett's multiple comparisons test to BDNF  
644 condition, \*  $p < 0.05$ ; \*\*  $p < 0.01$ ; \*\*\*  $p < 0.001$ ; \*\*\*\*  $p < 0.0001$ . Graphs represent mean  $\pm$ SEM.

FIGURE 5

HOLBORN, WALCZYK-MOORADALLY ET AL.

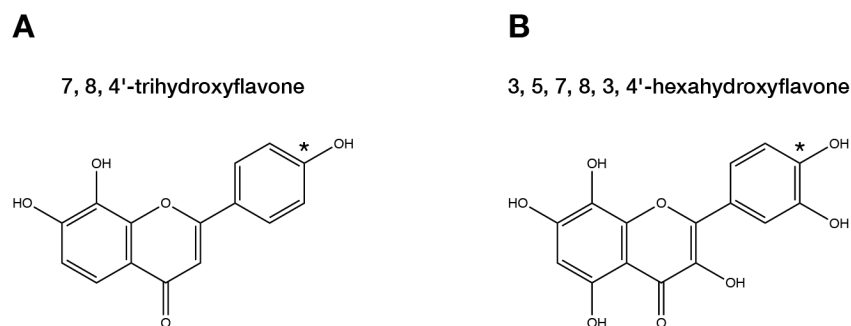

645  
646

647 **Figure 6.** Chemical structure of 7,8-dihydroxyflavone derivatives reported to block TrkB signaling  
648 in Liu and colleagues (2010). Asterisk indicates hydroxylated 4' position on B ring of each  
649 compound.

FIGURE 5

HOLBORN, WALCZYK-MOORADALLY ET AL.

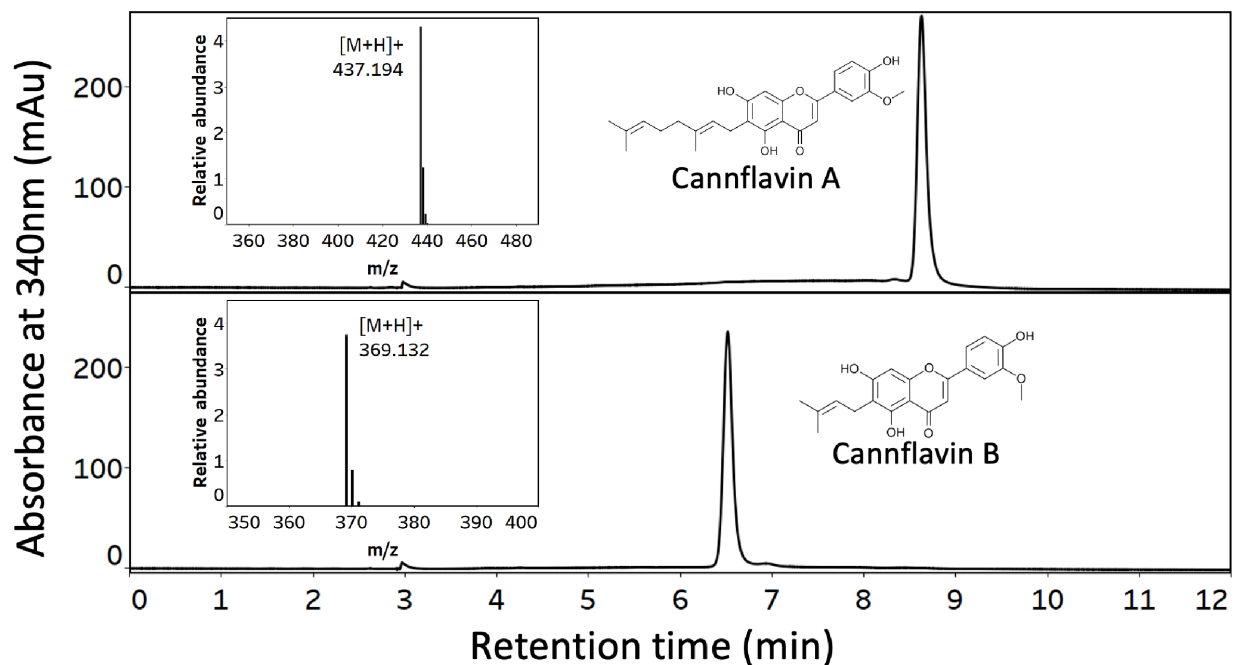

650  
651

652 **Supplementary Figure 1. Enzymatic production of cannflavin A and cannflavin B.**

653 Representative chromatograms illustrating pooled fractions of cannflavin A (top) and cannflavin  
654 B (bottom) quantified by DAD at 340 nm. Both Q-TOF mass spectra (inset) are consistent with  
655 the expected m/z of 6-geranyl chrysoeriol and 6-dimethylallyl chrysoeriol or cannflavins A and B,  
656 respectively.

657

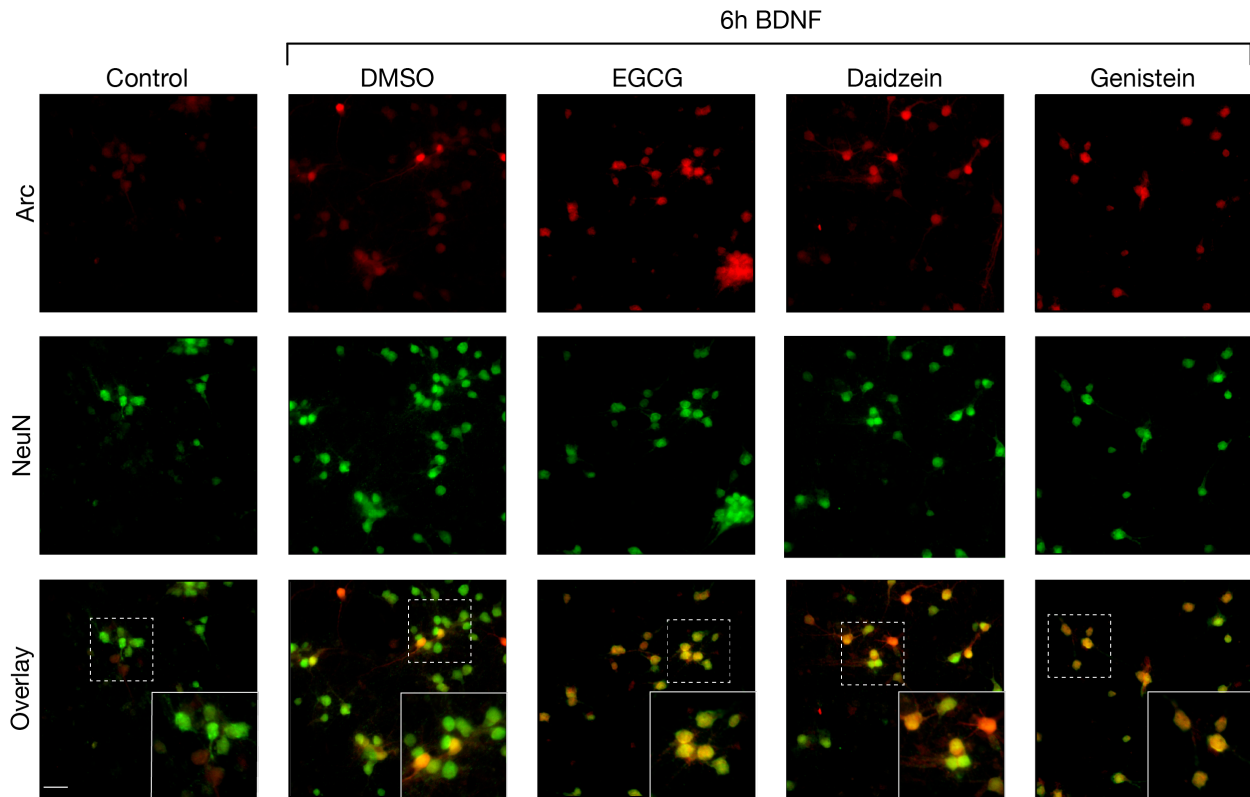

660 **Supplementary Figure 2. Effect of other flavonoids on BDNF-induced Arc expression level**  
661 **in mouse primary cortical neurons.** DIV14 cortical neurons were treated with BDNF for 6 h  
662 along with ECGC, daidzein, or genistein (final concentration 10  $\mu$ M). DMSO was used as control.  
663 Representative immunostaining of Arc (red fluorophore) in untreated primary cortical neurons and  
664 cells that were treated with BDNF and other compounds for 6 h. Consistent with data reported in  
665 Lalonde and colleagues (2017), daidzein and genistein increased Arc abundance at the tested  
666 concentration. Cells were co-immunostained with the neuronal marker NeuN (green fluorophore)  
667 to confirm specificity of staining to neurons. The high-magnification bottom-right insets in each  
668 panel show that Arc immunostaining in a BDNF-treated culture is particularly abundant in the  
669 nuclear compartment at the 6 h time point. Scale bar = 50  $\mu$ M.



FIGURE 5

HOLBORN, WALCZYK-MOORADALLY ET AL.

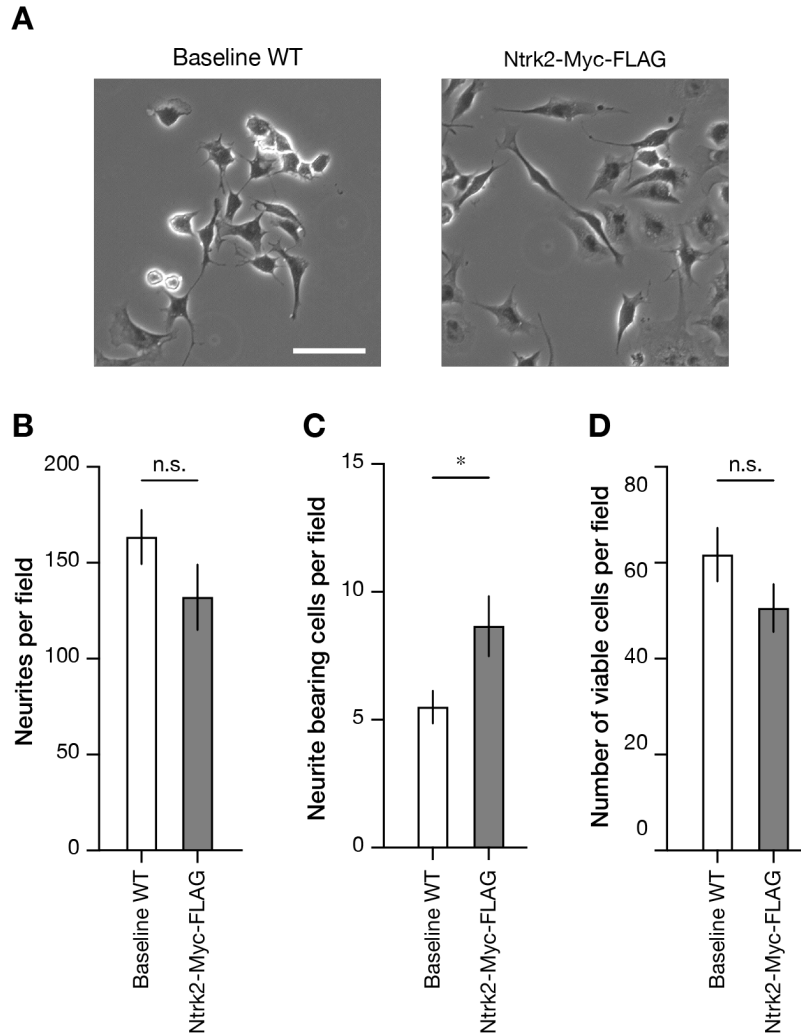

670

671 **Supplementary Figure 3. Stable overexpression of Myc-FLAG tagged TrkB increases**

672 **neurite outgrowths and survival in Neuro2a cells. A)** Phase contrast images of wild-type (WT,

673 left) and stably overexpressing Ntrk2-Myc-FLAG (right) Neuro2a cells. Images were quantified

674 by counting **B)** total number of neurites, **C)** total number of cells bearing neurites twice the length

675 of cell body, and **D)** number of viable cells per imaged area. \*  $p < 0.05$ , two-tailed unpaired  $t$ -test.

676 Graphs represent mean  $\pm$ SEM.

677 **Supplementary Table. GPCRome cannflavins report.** List of all 320 GPCRs tested in the  
678 PRESTO-Tango assay.
